# Supplementary material for: Development of mechanism-based antibacterial synergy between Fmoc-phenylalanine hydrogel and aztreonam
Source: Royal Society of Chemistry journal article supplement (doi:10.1039/c9bm01978b), 2020-01-01
Supplement: c9bm01978b1.pdf [file c9bm01978b1.pdf]

## Supporting Information

### **Development of mechanism-based antibacterial synergy of Fmoc-phenylalanine hydrogel with aztreonam**

Avinash Yashwant Gahane, Virender Singh, Ashok Kumar, Ashwani Kumar Thakur\*

<sup>a</sup>Department of Biological Sciences and Bioengineering, Indian Institute of Technology

Kanpur, Kanpur 208016, India

\*Corresponding Author:

Ashwani K Thakur, Email: [akthakur@iitk.ac.in](mailto:akthakur@iitk.ac.in)

Department of Biological Sciences and Bioengineering, Indian Institute of Technology

Kanpur, Kanpur 208016, India

## Contents

|                                                                                                            |     |
|------------------------------------------------------------------------------------------------------------|-----|
| 1. HPLC profile of AZT and Fmoc-F from AZT encapsulated Fmoc-F hydrogel                                    | S1  |
| 2. Different release kinetic models for simultaneous release profile of AZT                                | S2  |
| 3. Simultaneous release profile of Fmoc-F and different release kinetic models                             | S3  |
| 4. Effect of AZT encapsulated Fmoc-F hydrogel against <i>S. aureus</i> and <i>P. aeruginosa</i> co-culture | S4  |
| 5. Gram-staining of <i>S. aureus</i> and <i>P. aeruginosa</i> co-culture treated with AZT or Fmoc-F        | S5  |
| 6. Cytotoxic effect of Fmoc-F and AZT on MDCK cells                                                        | S6  |
| 7. Result parameters obtained after data analysis by Gompertz equation                                     | T1  |
| 8. Heat plot showing effect of AZT and Fmoc-F solution combination on <i>S. aureus</i> .                   | S7  |
| 9. Effect of polymyxin B + Fmoc-F combination against <i>P. aeruginosa</i>                                 | S8  |
| 10. Effect of polymyxin B on NPN fluorescence                                                              | S9  |
| 11. Effect of EDTA + Fmoc-F combination against <i>P. aeruginosa</i>                                       | S10 |

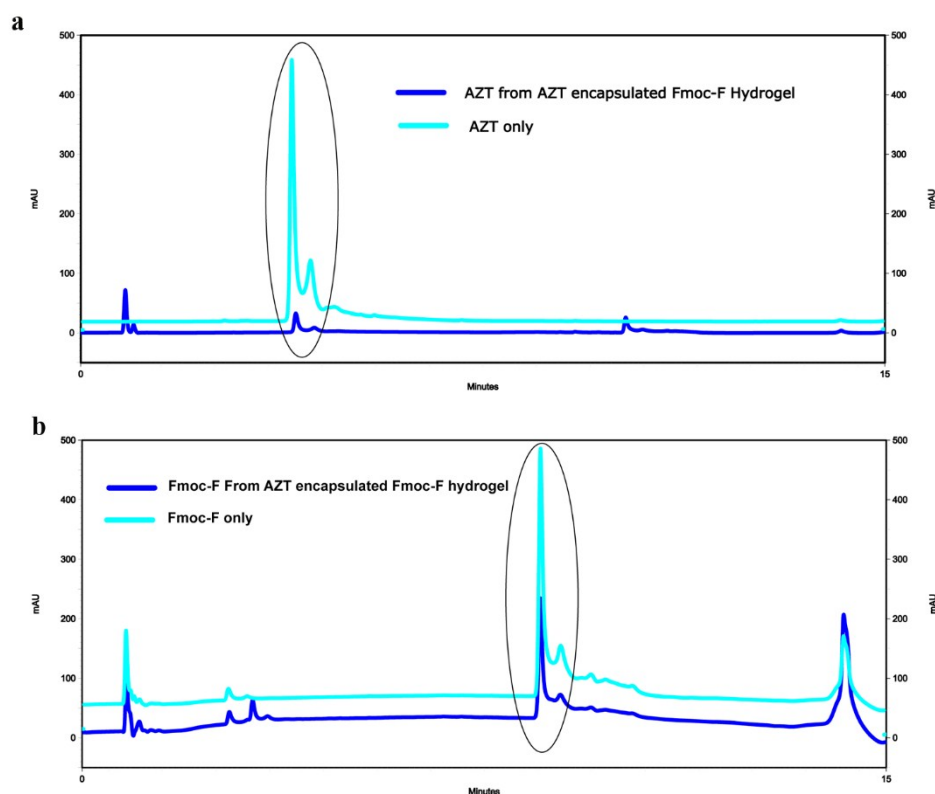

**Figure S1:** a) RP-HPLC profile of AZT from AZT encapsulated Fmoc-F hydrogel. b) HPLC profile of Fmoc-F from AZT encapsulated Fmoc-F hydrogel.

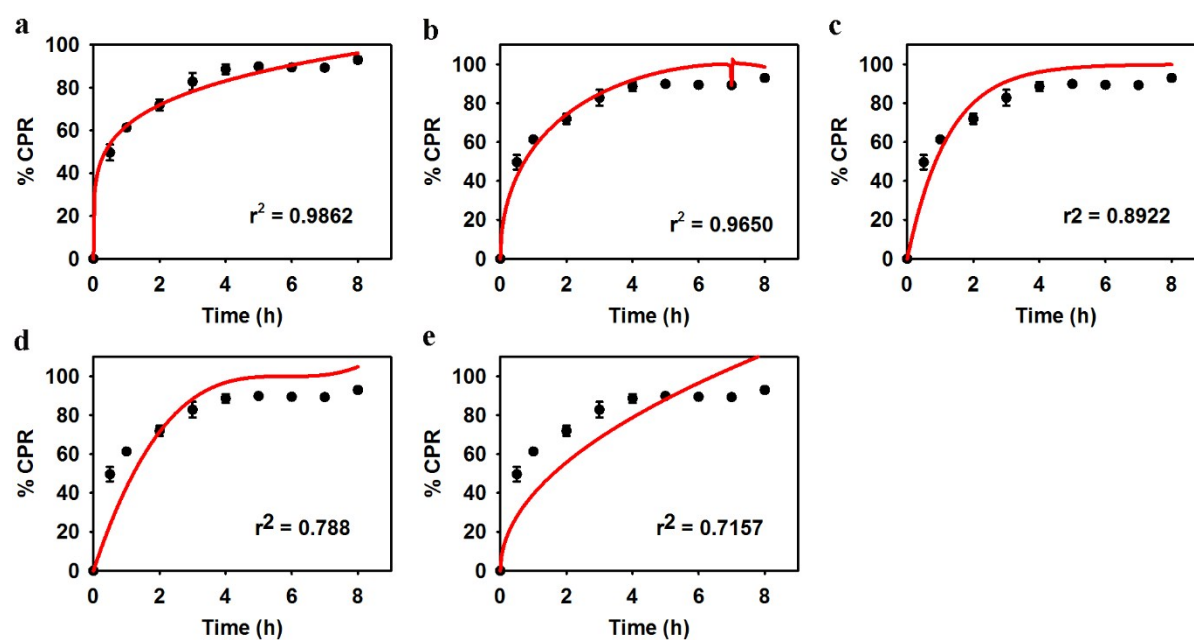

**Figure S2:** Different release kinetic models for simultaneous release profile of AZT from AZT encapsulated Fmoc-F hydrogel a) Kormeryer-Peppas model b) Baker and Lonsdale model c) First order kinetics model d) Hixon and Crowel model e) Higuchi Square Root Time model.

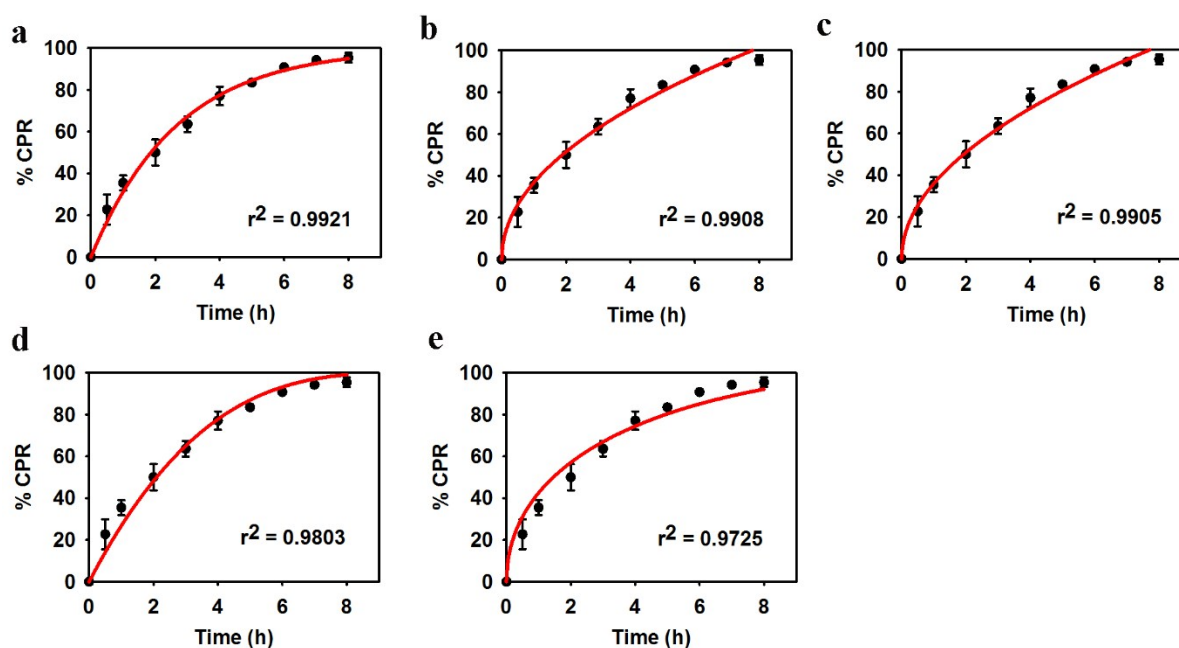

**Figure S3:** Simultaneous release profile of Fmoc-F from AZT encapsulated Fmoc-F hydrogel and different release kinetic models. a) First order kinetics model b) Kormeryer-Peppas model c) Higuchi Square Root Time model d) Hixon and Crowel model e) Baker and Lonsdale model.

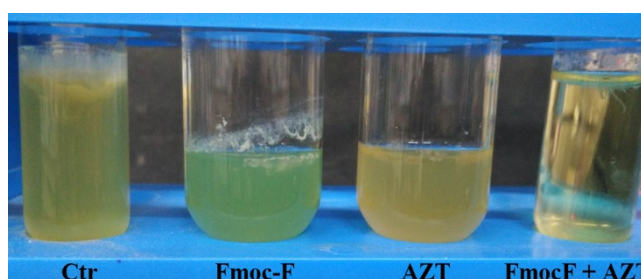

**Figure S4:** Effect of AZT encapsulated Fmoc-F hydrogel against *S. aureus* and *P. aeruginosa* co-culture.

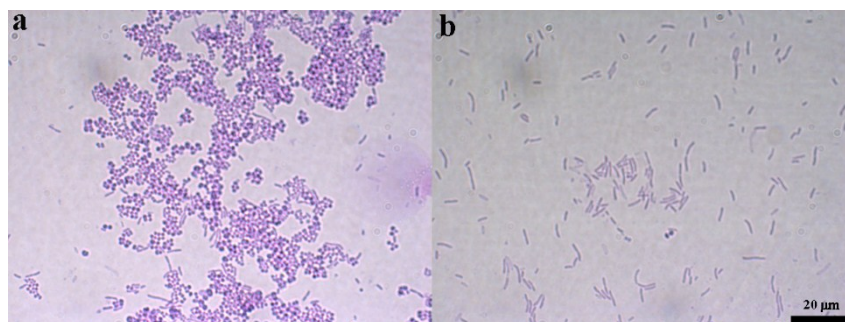

**Figure S5:** Gram-staining of *S. aureus* and *P. aeruginosa* co-culture treated with AZT (a) or Fmoc-F hydrogel (b) alone.

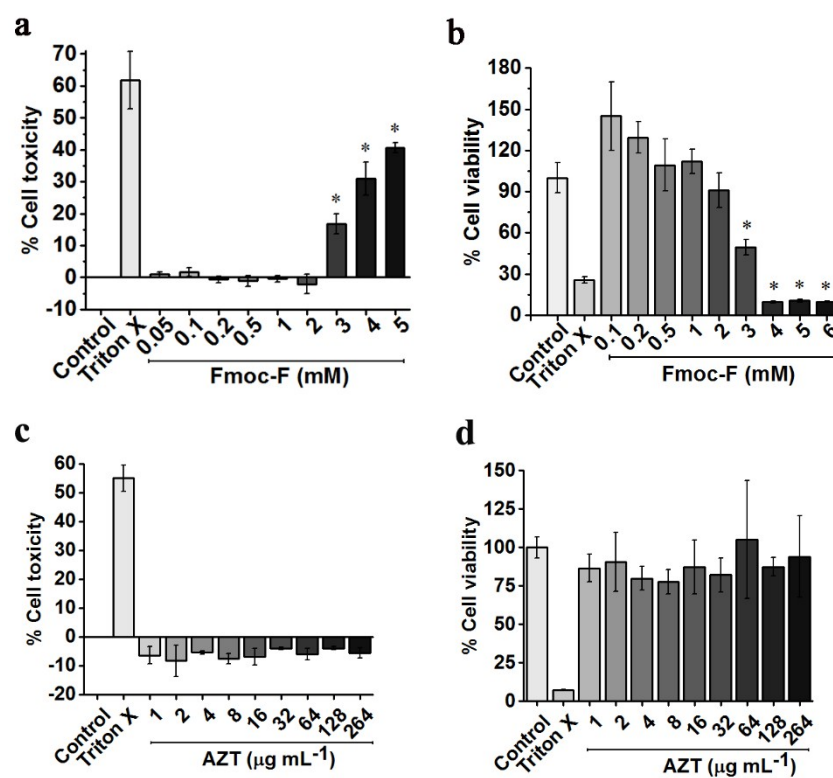

**Figure S6:** Cytotoxic effect of various concentrations of Fmoc-F (0.05 – 6 mM) on MDCK cells by LDH assay (a) or MTT assay (b). Cytotoxic effect of various concentrations of AZT (1 – 264 µg mL<sup>-1</sup>) on MDCK cells by LDH assay (c) or MTT assay (d). Triton X (1%) was used as positive

control. \* $p < 0.05$  vs control, One-way ANOVA followed by Dunnett's multiple comparison test.

**Table S1:** Result parameters obtained after data analysis by Gompertz equation to determine MIC of AZT or AZT in Fmoc-F hydrogel or AZT + Fmoc-F solution.

|                          | <b>AZT</b>      | <b>AZT in Fmoc-F hydrogel</b> | <b>AZT + Fmoc-F solution</b> |
|--------------------------|-----------------|-------------------------------|------------------------------|
| Best-fit values          |                 |                               |                              |
| logMIC                   | 1.767           | 1.031                         | -0.2489                      |
| Slope                    | 3.279           | 7.514                         | 2.219                        |
| Bottom                   | 1.644           | 0.05348                       | 1.091                        |
| Span                     | 97.66           | 50.79                         | 250.9                        |
| MIC                      | <b>58.53</b>    | <b>10.74</b>                  | <b>0.5638</b>                |
| Std. Error               |                 |                               |                              |
| logMIC                   | 0.09443         | 0.003513                      | 0.2938                       |
| Slope                    | 0.8979          | 0.1299                        | 1.803                        |
| Bottom                   | 4.464           | 0.05348                       | 0.5696                       |
| Span                     | 10.08           | 0.1753                        | 431.2                        |
| 95% Confidence Intervals |                 |                               |                              |
| logMIC                   | 1.467 to 2.068  | 0.9864 to 1.076               | -1.513 to 1.015              |
| Slope                    | 0.4216 to 6.136 | 5.863 to 9.164                | -5.540 to 9.979              |
| Bottom                   | -12.56 to 15.85 | -0.6260 to 0.7329             | -1.360 to 3.542              |
| Span                     | 65.59 to 129.7  | 48.57 to 53.02                | -1605 to 2106                |
| MIC                      | 29.30 to 116.9  | 9.692 to 11.90                | 0.03068 to 10.36             |
| Goodness of Fit          |                 |                               |                              |
| Degrees of Freedom       | 3               | 1                             | 2                            |
| R square                 | 0.9891          | 1.000                         | 0.9992                       |
| Absolute Sum of Squares  | 111.2           | 0.005719                      | 1.924                        |
| Sy.x                     | 6.088           | 0.07563                       | 0.9809                       |
| Number of points         |                 |                               |                              |
| Analyzed                 | 7               | 5                             | 6                            |

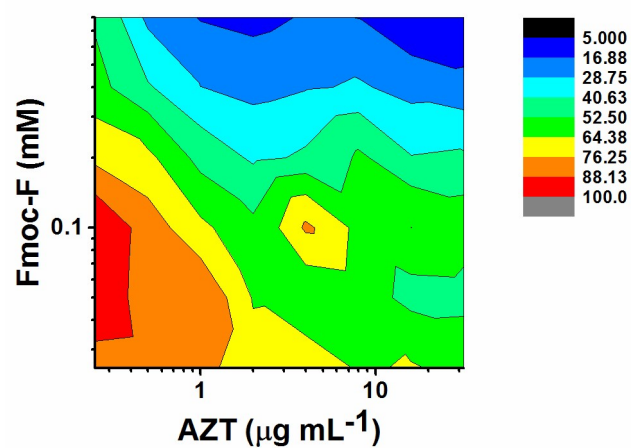

**Figure S7:** Heat plot showing the effect of AZT and Fmoc-F solution combination on *S. aureus*.

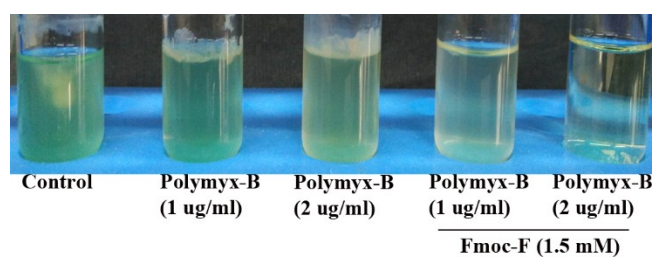

**Figure S8:** Effect of polymyxin B (1 or 2  $\mu\text{g mL}^{-1}$ ) + Fmoc-F (1.5 mM) combination or polymyxin B alone against *P. aeruginosa* using broth micro-dilution assay.

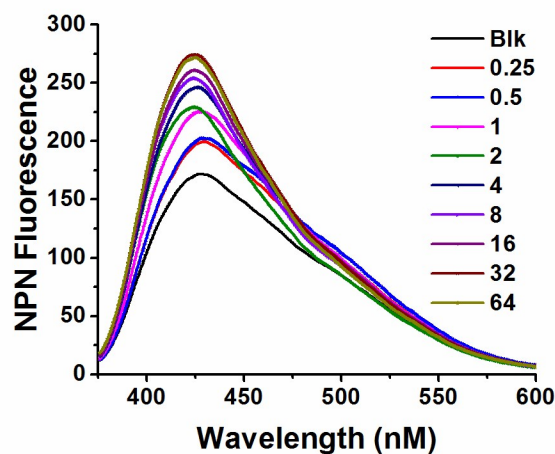

**Figure S9:** Effect of different concentrations (0.25 – 64  $\mu\text{g mL}^{-1}$ ) of polymyxin B on NPN fluorescence.

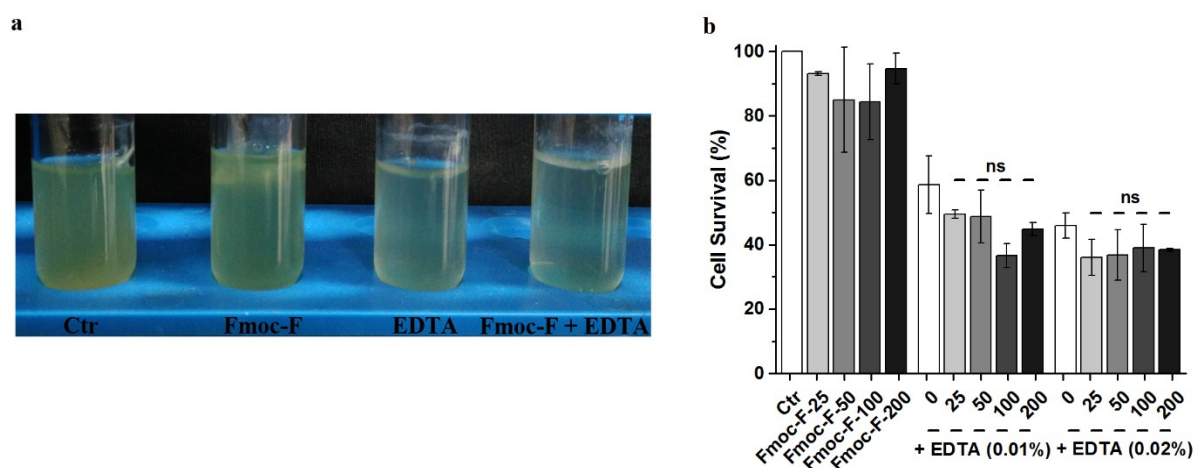

**Figure S10:** a) Effect of EDTA (0.02 %) + Fmoc-F (1.5 mM) combination or EDTA (0.02 %) alone against *P. aeruginosa* using broth micro-dilution assay. b) Effect of various concentrations of EDTA (0.01 or 0.02 %) + Fmoc-F (25 – 200  $\mu\text{M}$ ) combination or EDTA (0.01 or 0.02 %) alone against *P. aeruginosa* using broth micro-dilution assay. ns – nonsignificant, One-way ANOVA followed by Newman-Keuls multiple comparison test.
